# Supplementary material for: Novel antihyperglycaemic drugs and prevention of chronic obstructive pulmonary disease exacerbations among patients with type 2 diabetes: population based cohort study
Source: PubMed Central journal article supplement — BMJ. 2022 Nov 1;379:e071380. doi: 10.1136/bmj-2022-071380 (PMC9623550; doi:10.1136/bmj-2022-071380), 2022-11-01

## Table of Contents

|                                                                                                                                                                       |           |
|-----------------------------------------------------------------------------------------------------------------------------------------------------------------------|-----------|
| <b>Supplementary Table A: Reasons for the end of follow-up (GLP-1 receptor agonists vs sulfonylureas cohort) .....</b>                                                | <b>2</b>  |
| <b>Supplementary Figure A: Forest Plot Depicting Secondary Analyses Comparing GLP-1 receptor agonists with Sulfonylureas.....</b>                                     | <b>3</b>  |
| <b>Supplementary Figure B. Restricted Cubic Spline of Cohort Entry Period and the Association Between GLP-1 receptor agonists and Severe COPD Exacerbations .....</b> | <b>4</b>  |
| <b>Supplementary Figure C: Forest Plot Depicting Sensitivity Analyses Comparing GLP-1 receptor agonists with Sulfonylureas.....</b>                                   | <b>5</b>  |
| <b>Supplementary Table B: Reasons for the end of follow-up (DPP-4 inhibitors vs sulfonylureas cohort) .....</b>                                                       | <b>6</b>  |
| <b>Supplementary Figure D: Forest Plot Depicting Secondary Analyses Comparing DPP-4 inhibitors with Sulfonylureas.....</b>                                            | <b>7</b>  |
| <b>Supplementary Figure E. Restricted Cubic Spline of Cohort Entry Period and the Association Between DPP-4 inhibitors and Severe COPD Exacerbations .....</b>        | <b>8</b>  |
| <b>Supplementary Figure F: Forest Plot Depicting Sensitivity Analyses Comparing DPP-4 inhibitors with Sulfonylureas.....</b>                                          | <b>9</b>  |
| <b>Supplementary Table C: Reasons for the end of follow-up (SGLT-2 inhibitors vs sulfonylureas cohort) .....</b>                                                      | <b>10</b> |
| <b>Supplementary Figure G: Forest Plot Depicting Secondary Analyses Comparing SGLT-2 inhibitors with Sulfonylureas.....</b>                                           | <b>11</b> |
| <b>Supplementary Figure H. Restricted Cubic Spline of Cohort Entry Period and the Association Between SGLT-2 inhibitors and Severe COPD Exacerbations .....</b>       | <b>12</b> |
| <b>Supplementary Figure I: Forest Plot Depicting Sensitivity Analyses Comparing SGLT-2 inhibitors with Sulfonylureas.....</b>                                         | <b>13</b> |

---

**Supplementary Table A: Reasons for the end of follow-up (GLP-1 receptor agonists vs sulfonylureas cohort)**

---

| <b>Reasons</b>            | <b>Sulfonylurea</b> | <b>GLP-1 receptor agonists</b> |
|---------------------------|---------------------|--------------------------------|
| Outcome                   | 1261 (8.8%)         | 64 (5.1%)                      |
| Death                     | 1343 (9.4%)         | 31 (2.5%)                      |
| Administration            | 2272 (15.9%)        | 355 (28.4%)                    |
| Discontinuation/switching | 9383 (65.8%)        | 802 (64.1%)                    |

---

**Supplementary Figure A: Forest Plot Depicting Secondary Analyses Comparing GLP-1 receptor agonists with Sulfonylureas**

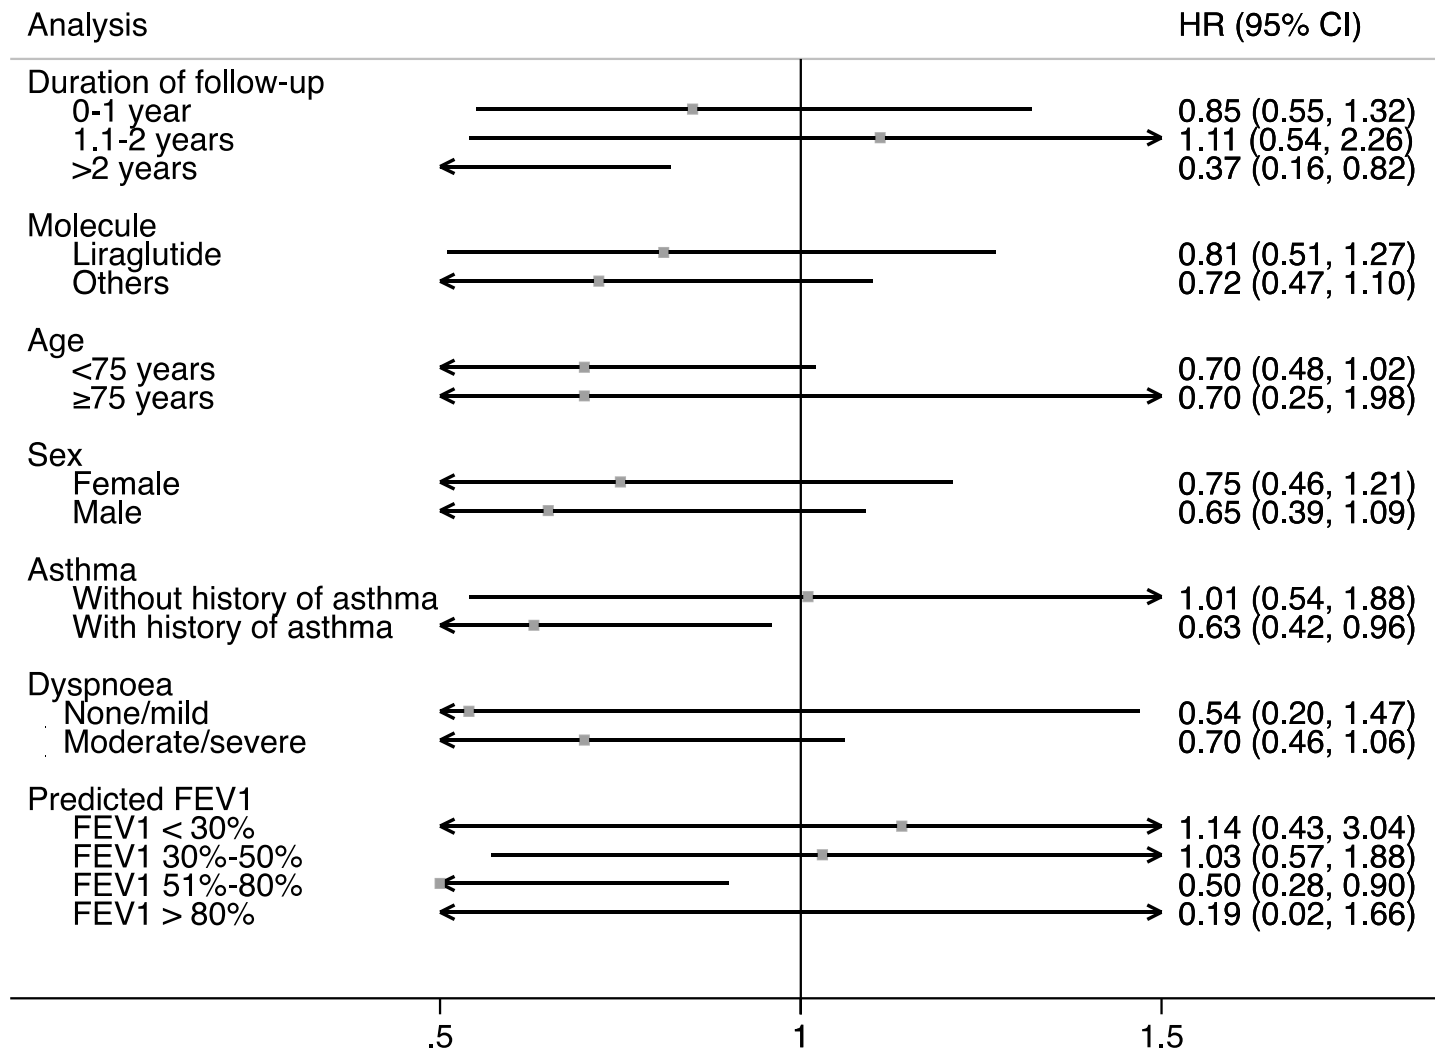

**Supplementary Figure B. Restricted Cubic Spline of Cohort Entry Period and the Association Between GLP-1 receptor agonists and Severe COPD Exacerbations**

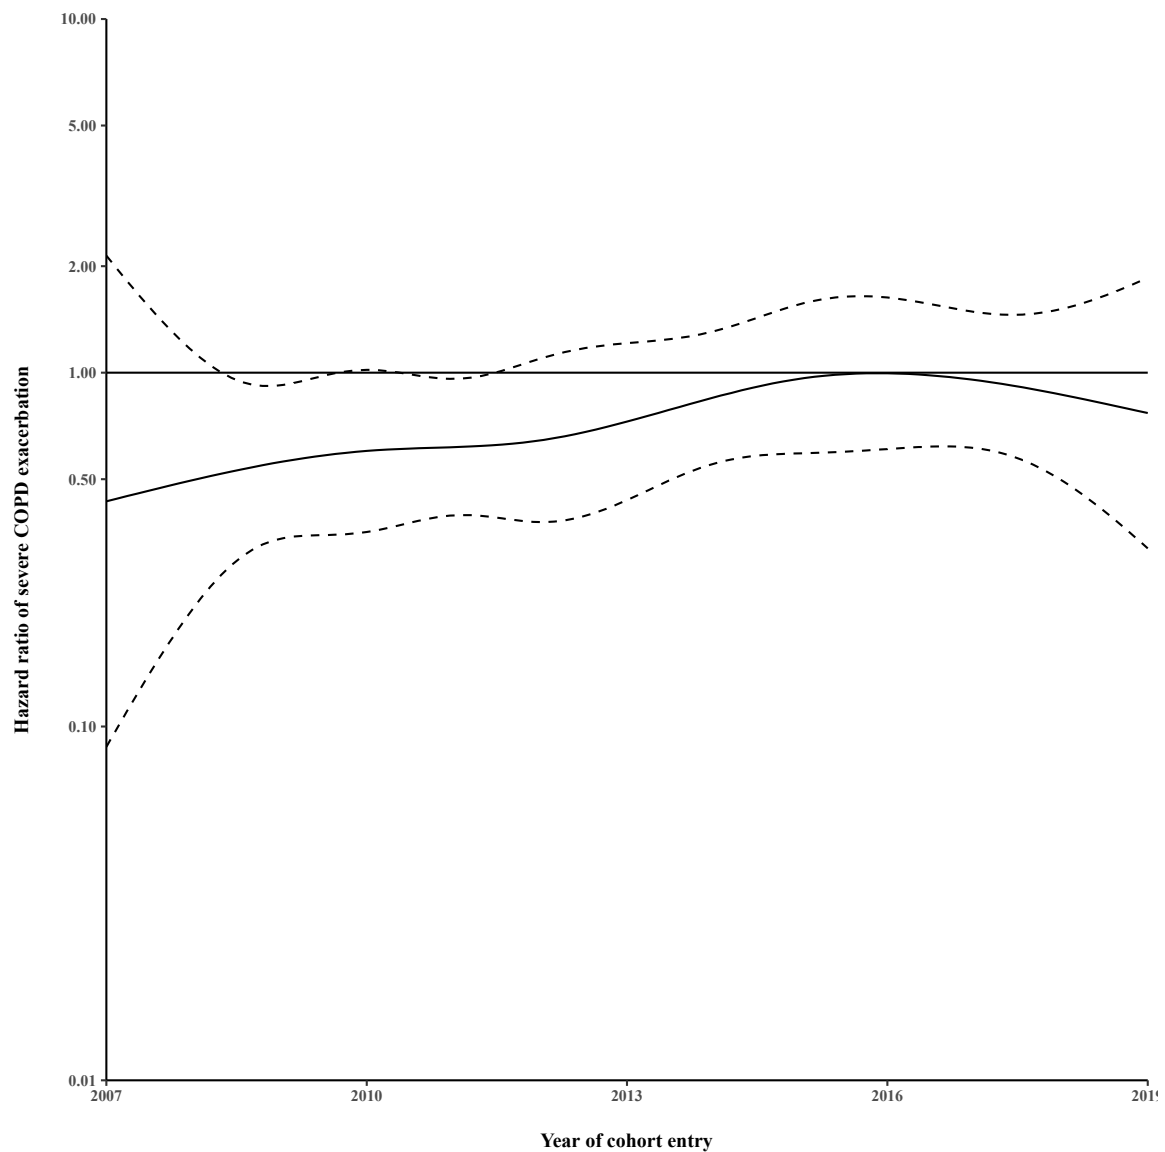

**Supplementary Figure C: Forest Plot Depicting Sensitivity Analyses Comparing GLP-1 receptor agonists with Sulfonylureas**

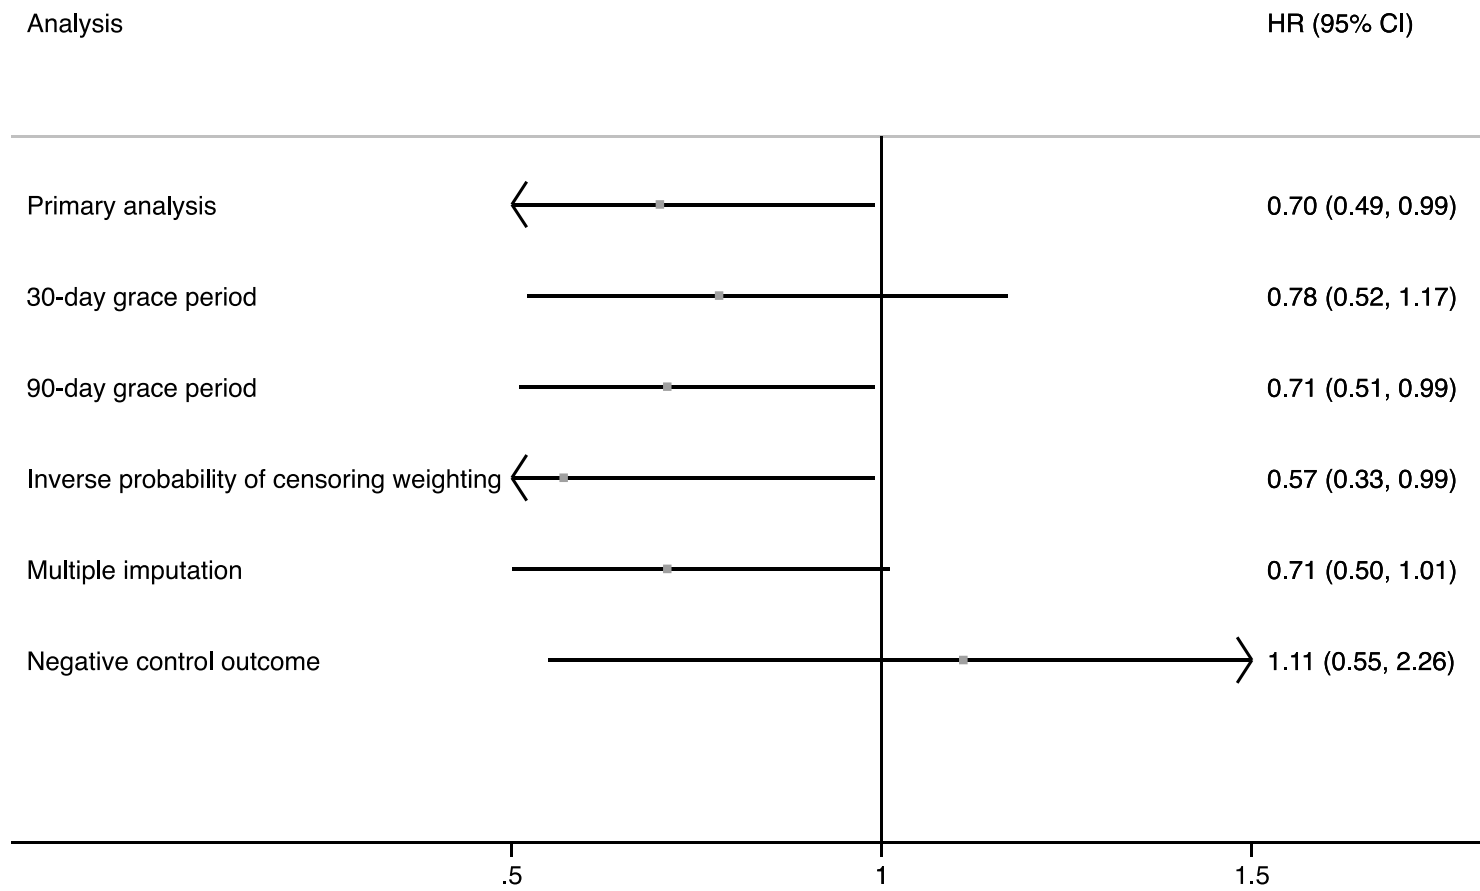

---

**Supplementary Table B: Reasons for the end of follow-up (DPP-4 inhibitors vs sulfonylureas cohort)**

---

| <b>Reasons</b>            | <b>Sulfonylurea</b> | <b>DPP-4 inhibitors</b> |
|---------------------------|---------------------|-------------------------|
| Outcome                   | 1827 (10.0%)        | 611 (7.0%)              |
| Death                     | 2233 (12.3%)        | 665 (7.6%)              |
| Administration            | 2731 (15.0%)        | 2850 (32.6%)            |
| Discontinuation/switching | 11,413 (62.7%)      | 4605 (52.7%)            |

---

**Supplementary Figure D: Forest Plot Depicting Secondary Analyses Comparing DPP-4 inhibitors with Sulfonylureas**

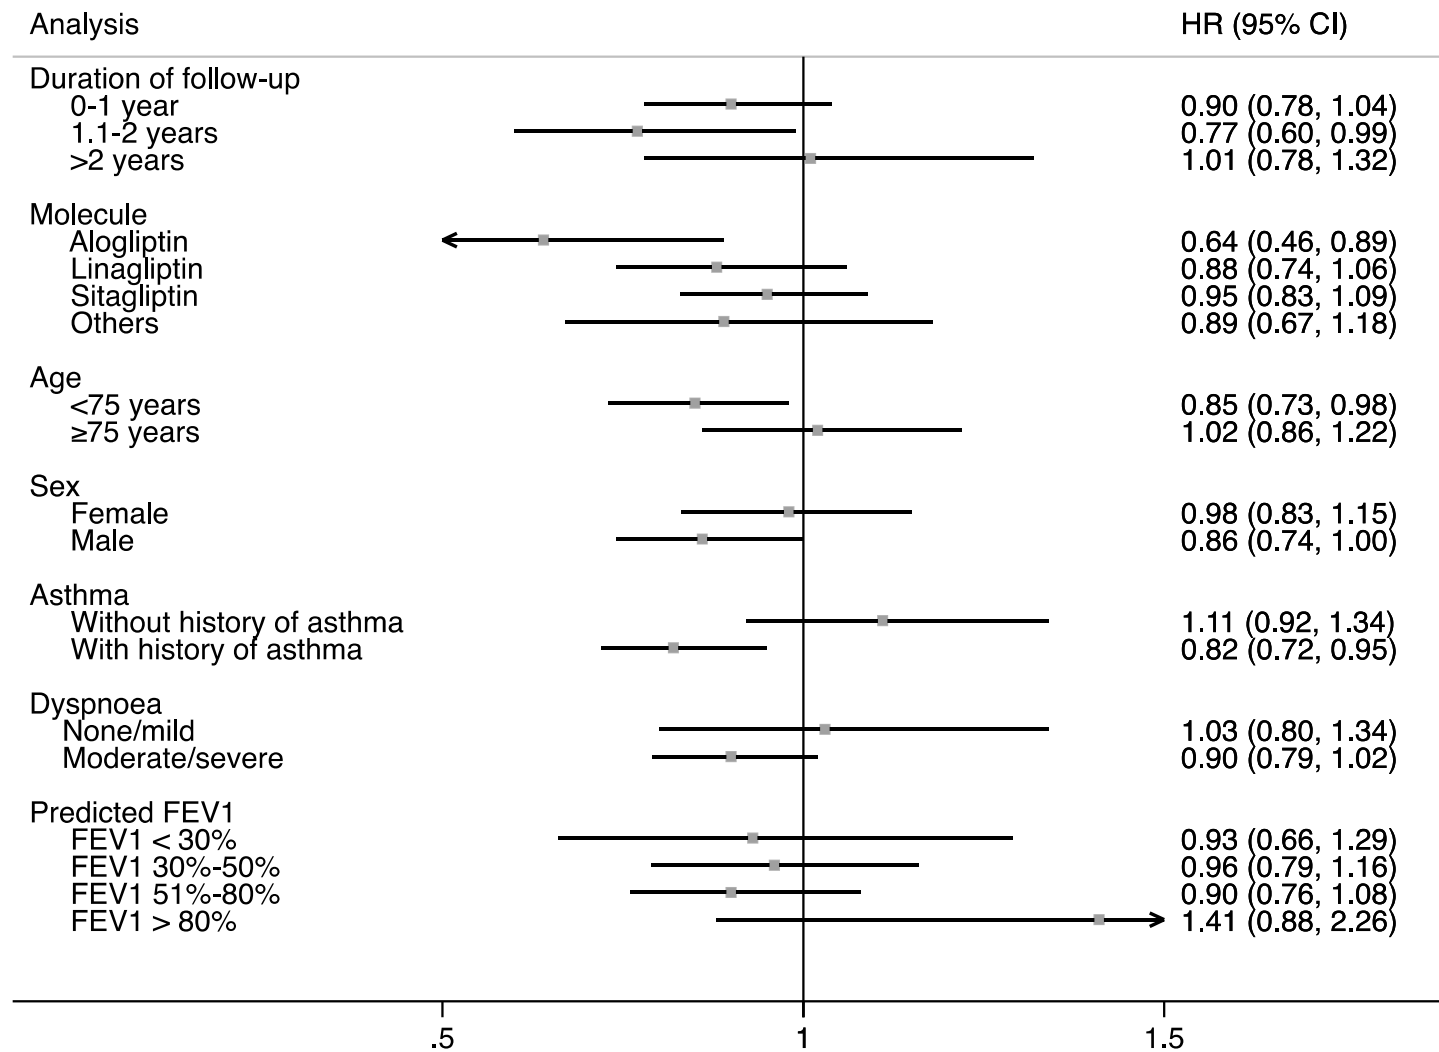

**Supplementary Figure E. Restricted Cubic Spline of Cohort Entry Period and the Association Between DPP-4 inhibitors and Severe COPD Exacerbations**

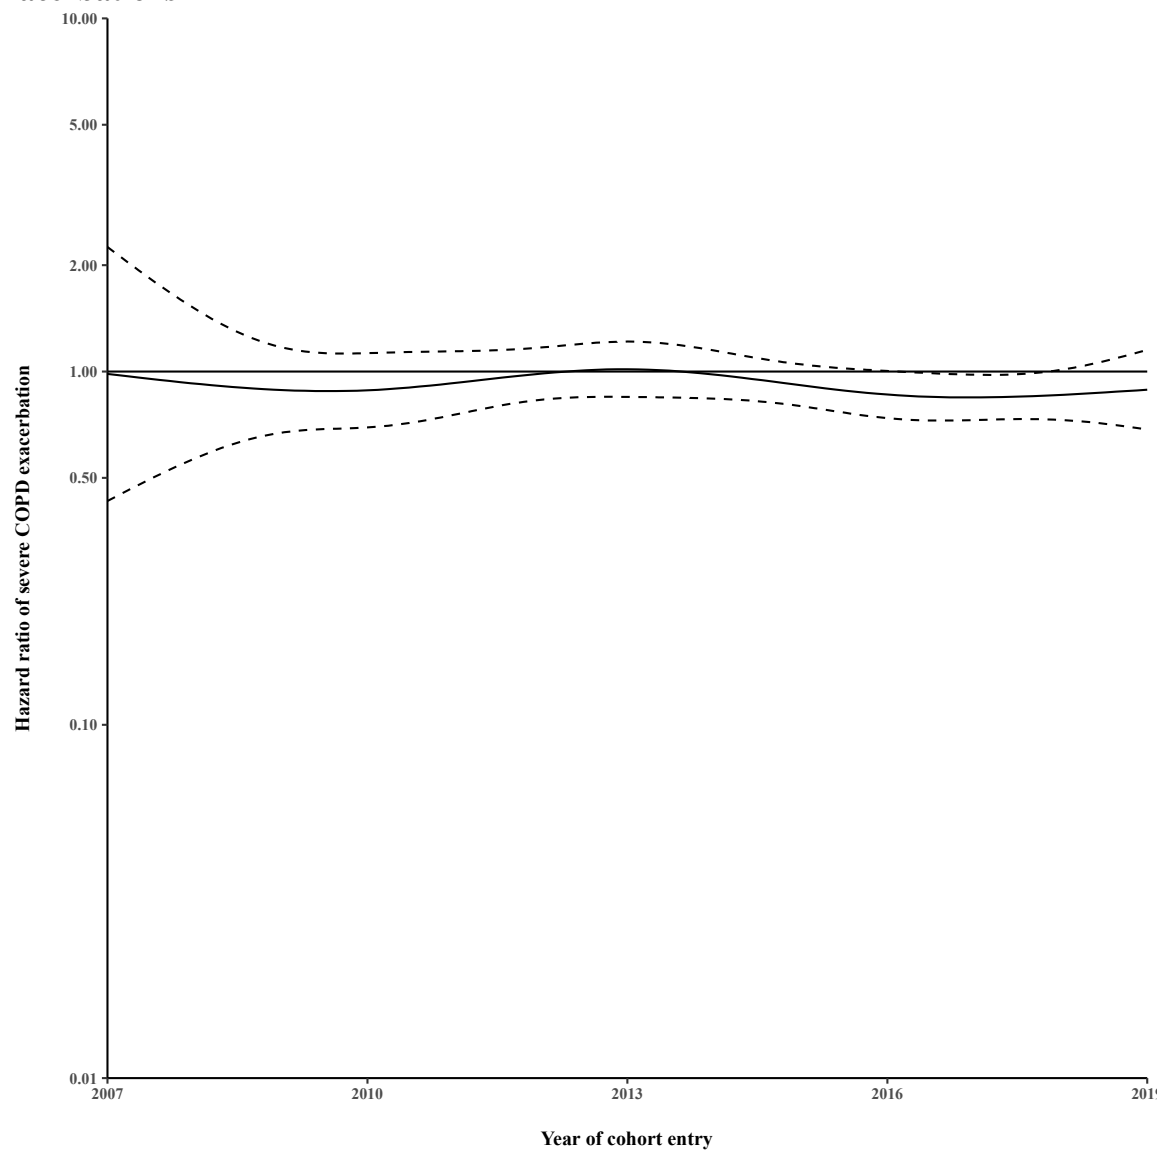



**Supplementary Figure F: Forest Plot Depicting Sensitivity Analyses Comparing DPP-4 inhibitors with Sulfonylureas**

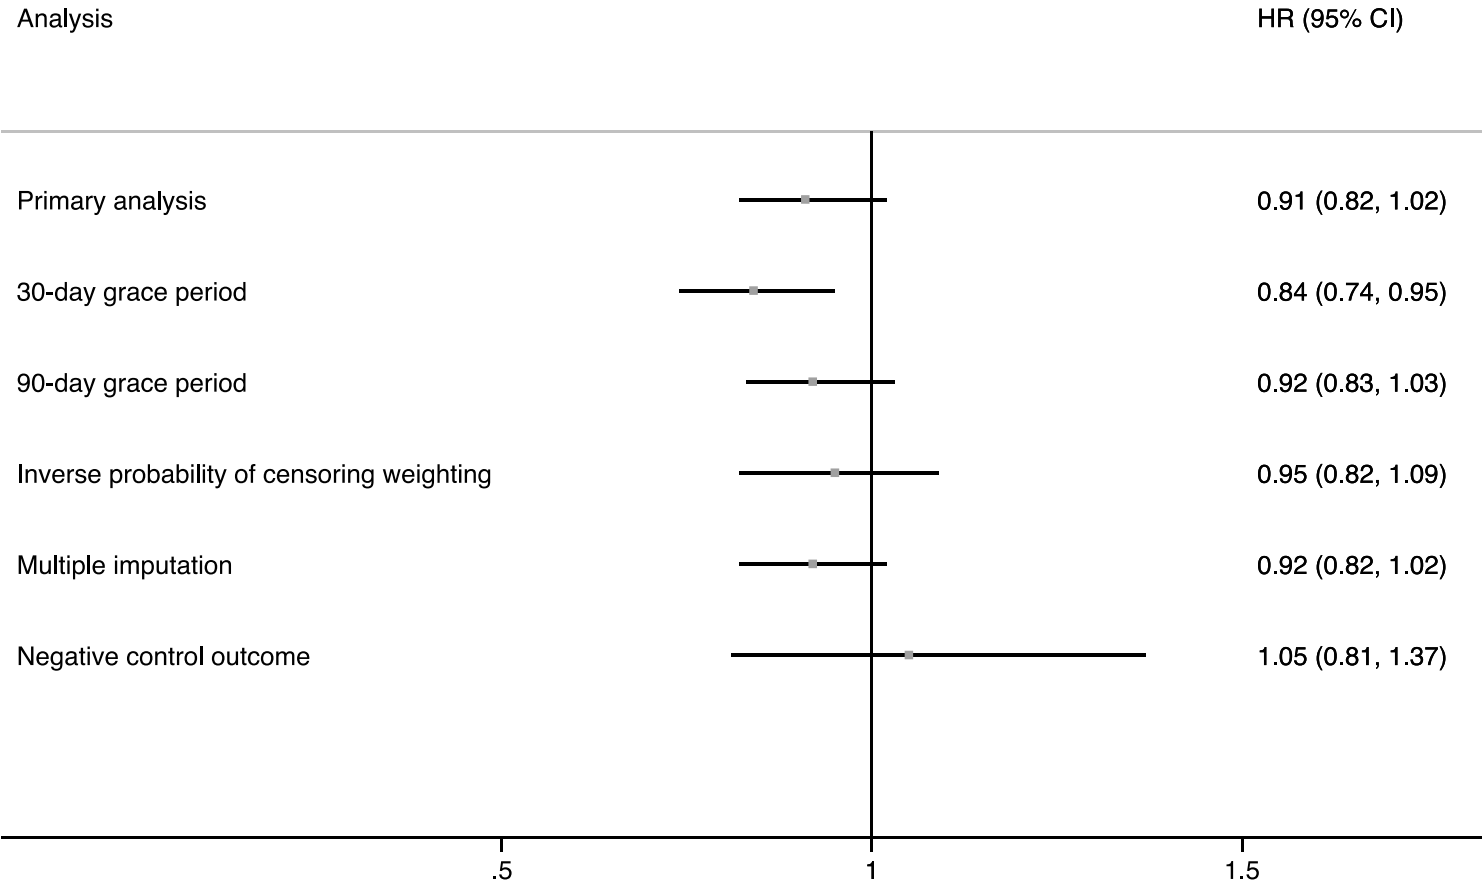

---

**Supplementary Table C: Reasons for the end of follow-up (SGLT-2 inhibitors vs sulfonylureas cohort)**

---

| <b>Reasons</b>            | <b>Sulfonylurea</b> | <b>SGLT-2 inhibitors</b> |
|---------------------------|---------------------|--------------------------|
| Outcome                   | 1006 (9.3%)         | 92 (3.1%)                |
| Death                     | 1144 (10.6%)        | 62 (2.1%)                |
| Administration            | 2731 (25.2%)        | 1249 (42.3%)             |
| Discontinuation/switching | 5960 (55.0%)        | 1553 (52.5%)             |

---

**Supplementary Figure G: Forest Plot Depicting Secondary Analyses Comparing SGLT-2 inhibitors with Sulfonylureas**

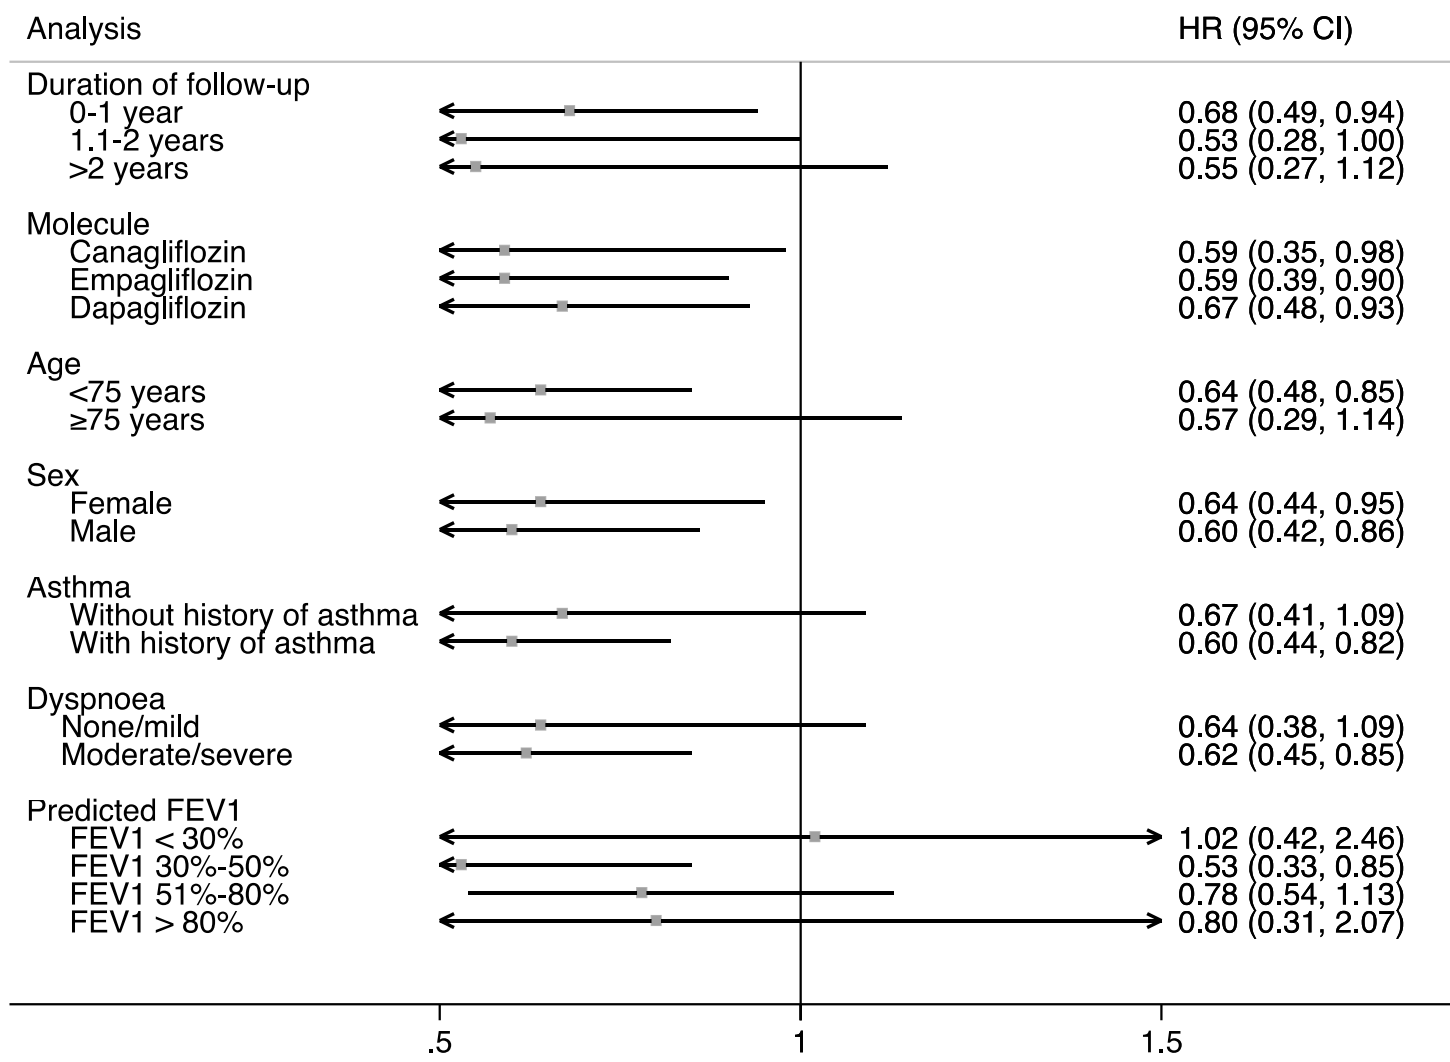

**Supplementary Figure H. Restricted Cubic Spline of Cohort Entry Period and the Association Between SGLT-2 inhibitors and Severe COPD Exacerbations**

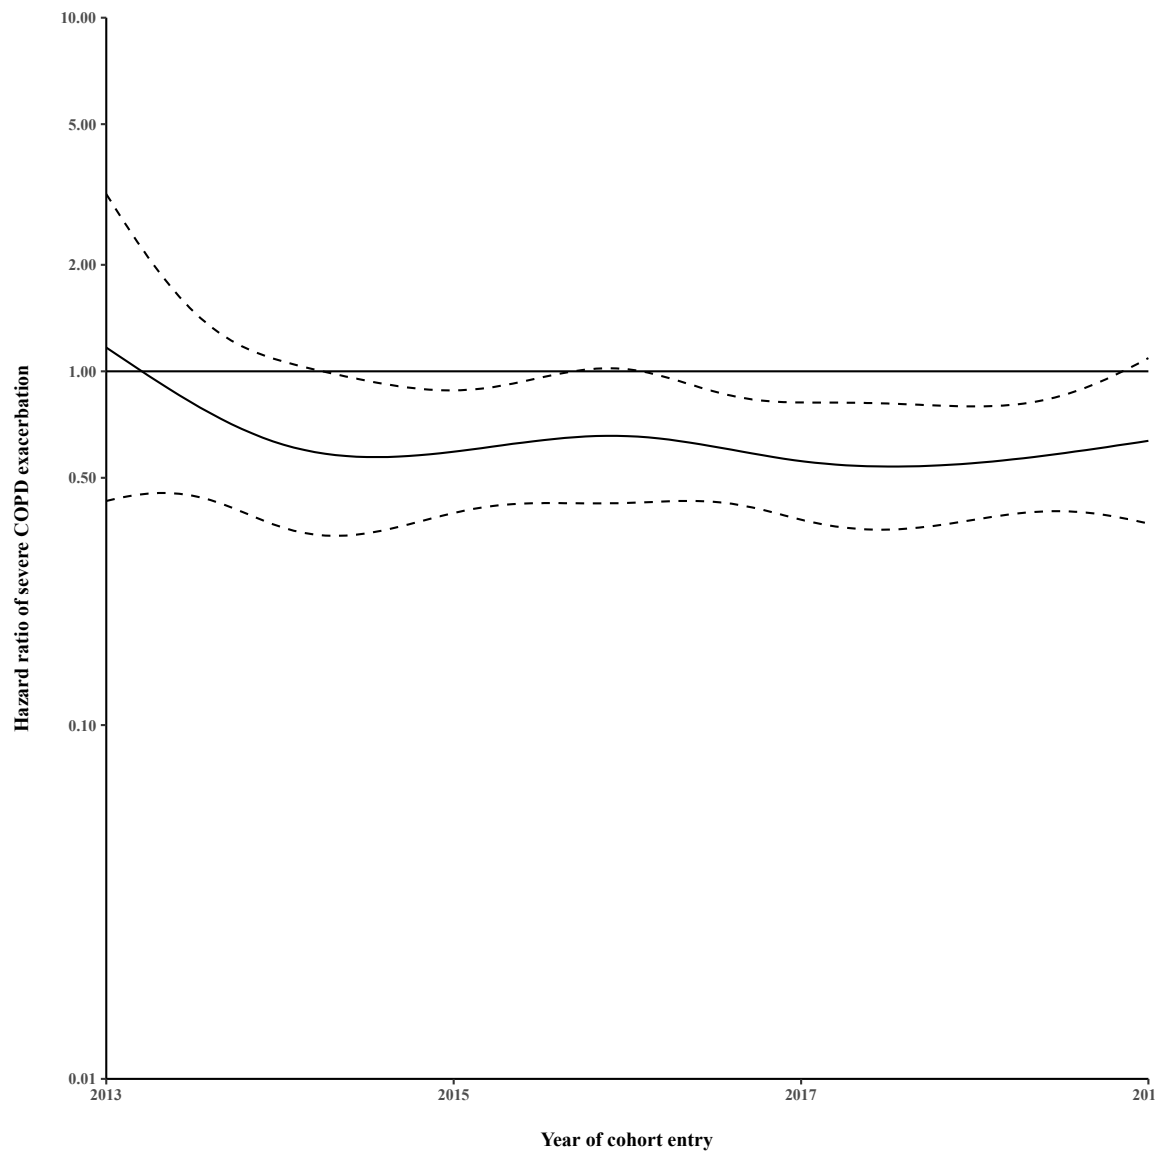

**Supplementary Figure I: Forest Plot Depicting Sensitivity Analyses Comparing SGLT-2 inhibitors with Sulfonylureas**

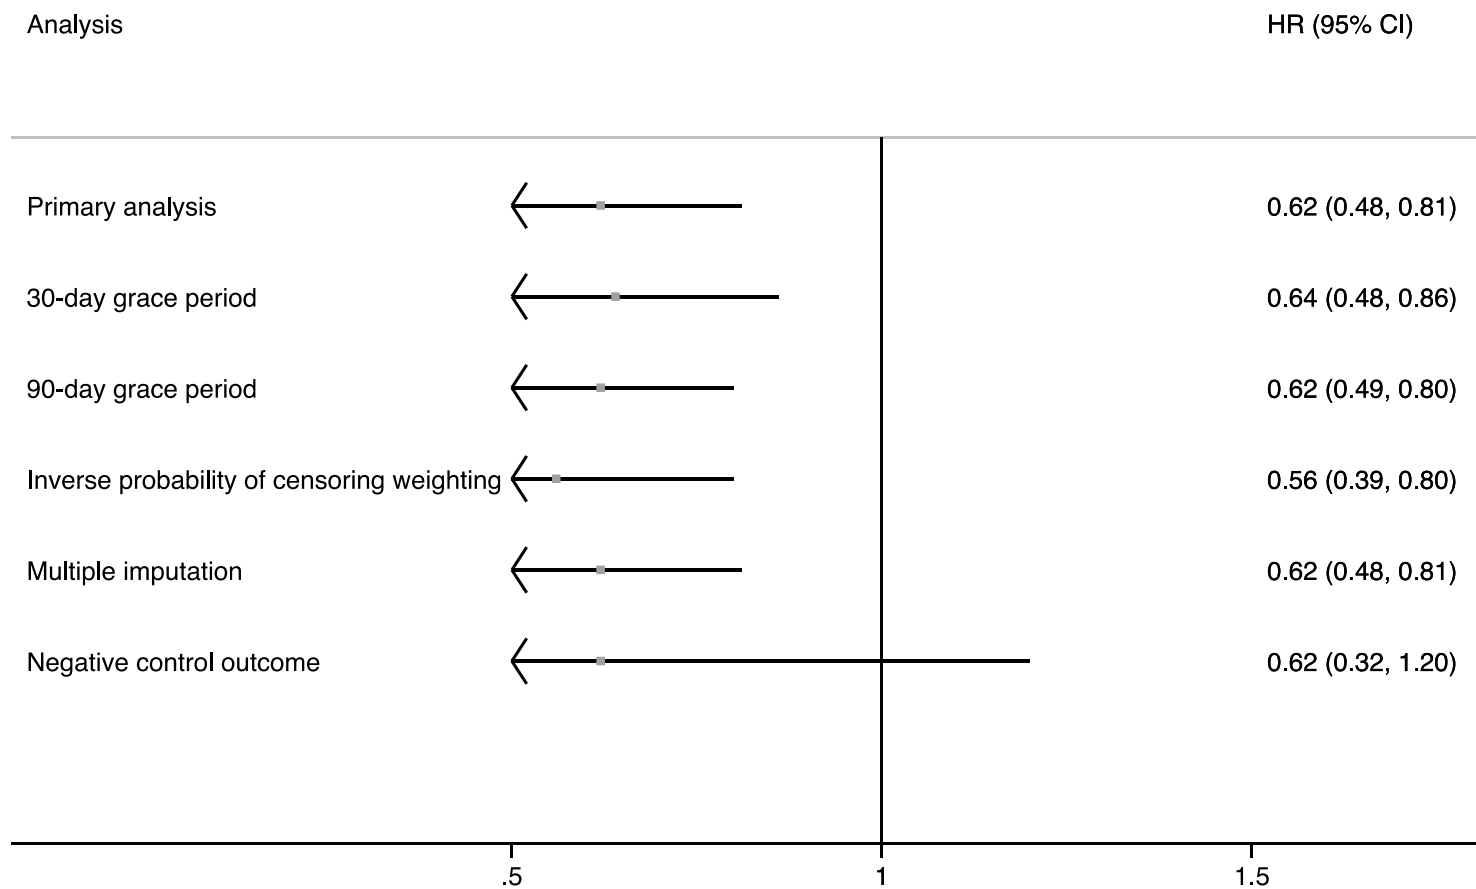

Supplement: prar071380.ww1.pdf [file prar071380.ww1.pdf]
